# Supplementary material for: Durable fluorinated cobalt oxyhydroxide/calcium alginate hydrogels for activating peroxymonosulfate to enable nearly 100% degradation of ciprofloxacin
Source: Royal Society of Chemistry journal article supplement (doi:10.1039/d4ra06321j), 2024-01-01
Supplement: d4ra06321j1.pdf [file d4ra06321j1.pdf]

**Designing a durable catalyst of fluorinated cobalt oxyhydroxide/calcium alginate hydrogel for enabling nearly 100% degradation of ciprofloxacin**

Yunxiong Zeng,<sup>a</sup> Zhilong Zhang,<sup>a</sup> Xingyu Zhan,<sup>a</sup> Bo Hong,<sup>a</sup> Xinqing Wang,<sup>a</sup> Yingchun Xia,<sup>b,c,\*</sup>

<sup>a</sup> College of Materials and Chemistry, Zhejiang Province Key Laboratory of Magnetic Materials, China Jiliang University, Hangzhou 310018, People's Republic of China

<sup>b</sup> Department of Chemical Engineering, Tsinghua University, Beijing 100084, People's Republic of China

<sup>c</sup> Hefei Institute for Public Safety Research, Tsinghua University, Hefei 230601, People's Republic of China

**Corresponding Author:** Dr. Yingchun Xia

Department of Chemical Engineering, Tsinghua University, Beijing 100084, People's Republic of China

**Email:** xiayc6@163.com

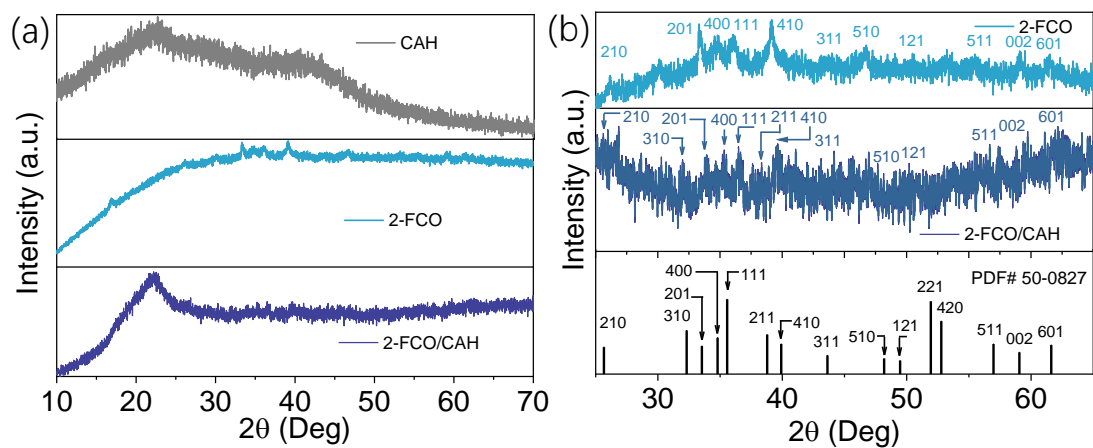

**Fig. S1** (a) XRD pattern and enlarge XRD pattern of 2-FCO, CAH and 2-FCO/CAH.

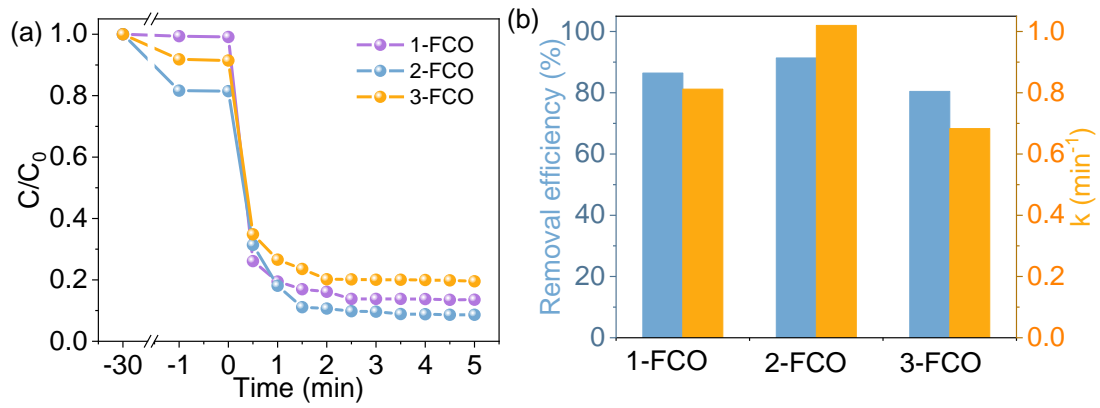

**Fig. S2** (a) The CIP degradation by 1-FCO, 2-FCO and 3-FCO, (b) the corresponding CIP removal efficiency and kinetic constants of 1-FCO, 2-FCO and 3-FCO.

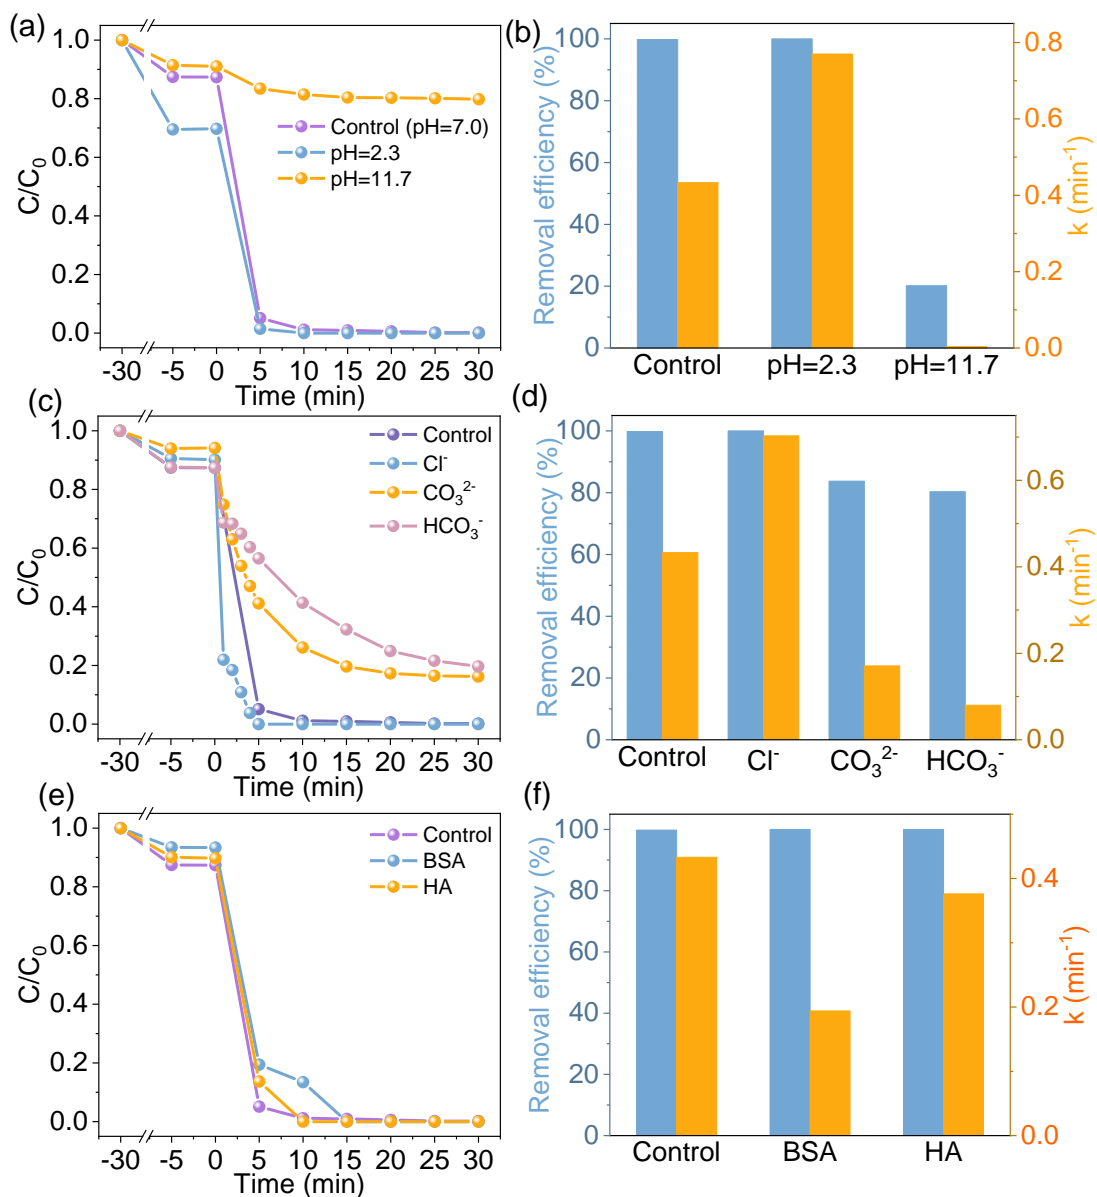

**Fig. S3** Interfering factor that affecting activity of 2-FCO/CAH: (a, b) pH, (c, d) inorganic ions and (e, f) organics.
